# Supplementary material for: Functional Characterization and Structure-Guided Mutational Analysis of the Transsulfuration Enzyme Cystathionine γ-Lyase from Toxoplasma gondii
Source: PubMed Central journal article supplement (PMC6073527; doi:10.3390/ijms19072111), 2018-07-20
Supplement: ijms-19-02111-s001.pdf [file ijms-19-02111-s001.pdf]

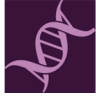

# Functional Characterization and Structure-Guided Mutational Analysis of The Transsulfuration Enzyme Cystathionine $\gamma$ -Lyase from *Toxoplasma gondii*

## Supplemental Figures

|               |                                                               |     |
|---------------|---------------------------------------------------------------|-----|
| T. gondii     | MASKQNDKDGAVRRDASFECGVKAGDWLPGFTPREETVYVHGGVEPDP-LTGAILPPIYQ  | 59  |
| L. major      | MSSQ-----QHLVSDFTAGSGSWLPQSQ-GFDTLQVHAGVRPDP-VTGAILTPIYQ      | 49  |
| T. cruzi      | MSSQ-----KHLVSDFTAGSGSWLDQTY-GFDTVLVHGGVVKPDP-VTGAVLTPVYQ     | 49  |
| T. grayi      | MSGA-----QHLFADFSEGGSGWQPQAQ-GFETLLVHGGVVKPDP-VTGAILTPVYQ     | 49  |
| M. musculus   | -----MQKDASLSGFLPSFQ-HFATQAIHVQDEPEQWNSRAVVLPISL              | 42  |
| H. Sapiens    | -----MQEKDASSQGFLPHFQ-HFATQAIHVQDEPEQWNSRAVVPPIISL            | 43  |
| S. Cerevisiae | -----MTL-----QESD-KFATKAIHAGEHVD--VHGSVIEPISL                 | 32  |
| C. albicans   | -----MTI-----ESSTNY-SFGTKAIHAGAPLDP-STGAVIEPISL               | 35  |
|               | * * * * *                                                     |     |
| T. gondii     | NTTFVQESVENYLSKGFSSKSRTSNPTVLSLEKKIAEIEGGFGACCFATGMAATVTIFSAF | 119 |
| L. major      | STTFVQESINSYQAKGYSKTRSANPTVAVLEQKLCALENGSYCTVYNTGMAATTTAISF   | 109 |
| T. cruzi      | STTFVQESIGIKYQSKGYSKTRCANPTVSLERKLCALENGDIATVYSTGMSATTTAISF   | 109 |
| T. grayi      | STTFVQESIERYQAKGYSKTRSANPTVSALEKLCALIEHGEYATVYSTGMSATTTAISF   | 109 |
| M. musculus   | ATTFKQDFPGQ-SSG-FEYSRSGNPTNRCLEKAVAAALDGAKHSLAFASGLAATITITH-L | 99  |
| H. Sapiens    | STTFKQAGPQ-HSG-FEYSRSGNPTNRCLEKAVAAALDGAKYCLAFASGLAATVITH-L   | 100 |
| S. Cerevisiae | STTFKQSSPAN-PIGTYEKSRSONPNRENLERAVAALENAQYGLAFSSGSAATTATILQ-S | 90  |
| C. albicans   | STTFKQSEPSK-PLGIYEKSRSSNPNRDNFEITVAVALESAKYAIALLSSGSAATLVIQ-S | 93  |
|               | *** * : * * * * * : * : : * : * : *                           |     |
| T. gondii     | LAPGDHCLVTNCSYGGTNRCARLHFSKYNIDFEFIDFRDPTNVEKAIRPQTKVVFSESPC  | 179 |
| L. major      | MNAGDHAILTNCYGGTNRACRVFFSRLGMEFTFVDMRDQPNVIDSIKPNTKLVISETPA   | 169 |
| T. cruzi      | MSAGDHAIITDCSYGGTNRACRVFFPRFGMEFTFVDMRDLKNVEAAIKPNTKLVSETPA   | 169 |
| T. grayi      | MSAGDHAIVTECSYGGTNRACRVFFTRLGMSFTFVDMRDVKNVEAAIKPNTKLVISEPA   | 169 |
| M. musculus   | LKAGDEIICMDEVYGGTNRVFRVASEFGLKISFVDCSKTKLLEAAITPQTKLVWIETPT   | 159 |
| H. Sapiens    | LKAGDQIICMDDVYGGTNRVFRVASEFGLKISFVDCSKIKLLEAAITPETKLVWIETPT   | 160 |
| S. Cerevisiae | LPQGSHAVSIGDVGTHRYFTKVANAHGVETSFTNDLLN-DLPQLIKENTKLVWIETPT    | 149 |
| C. albicans   | LPINSHIVSSGDVYGGTHRYFTKVANHGVETAQVGNLVE-DLQALRENTRLVWLETPS    | 152 |
|               | : . . . : * * * * : * : : * : : * : * : *                     |     |
| T. gondii     | NPTLYLADIEAISQICKEK-----KVLHVCDSTFATPYMMRPLDLGADIVVQSTRYVD    | 233 |
| L. major      | NPTLILIDVAAVSKICKER-----GIVHMCNTFATAYIMRPLDHGADVTLISTRYVD     | 223 |
| T. cruzi      | NPTLTLDTLDELKSLCKAK-----GLIHVCNTFATAFIMRPLDLGADVTLISTRYVD     | 223 |
| T. grayi      | NPTLTLTDIDALSILCKAK-----GIHMCNTFATAFIMRPLDHGADVTLISTRYVD      | 223 |
| M. musculus   | NPTLKLADIGACAQIVHKR-----GDIILVVDNTFMSAYFQRPLALGADICMSATRYMN   | 214 |
| H. Sapiens    | NPTQKVIDIEGCAHIVHKH-----GDIILVVDNTFMSPYFQRPLALGADISMSATRYMN   | 215 |
| S. Cerevisiae | NPTLKVTDIQKVADLIKKAH--AGQDVILVVDNTFLSPYISNPLNFGADIVVHSATRYIN  | 207 |
| C. albicans   | NPTLQVTDIAKVKSIILVDHEAKTGNKVLAVDNTFLSPYLSNPLTHGADVHVHSVTRRYIN | 212 |
|               | * * : * : : : * * * : : * * * * : * * * : *                   |     |
| T. gondii     | GHNCTLGGAVISSKEIHDKVFVFLRNVMGNIMSQAFTAFYTLTLKTLPIRVEKQSANAQK  | 293 |
| L. major      | GHDMTVGGALVTNSKELDAKVRILTQNILGNVMSQVAFVLQQLTVKTMRLVTKQSHNAQK  | 283 |
| T. cruzi      | GHNMTVGGALVTKRKLDEKVRILTQNILGNMSPFVAYLQQLTVKTMRLVTKQSHNAQK    | 283 |
| T. grayi      | GHNMTVGGALVTKSKELDKVRLTQNILGNMSPFVAYLQQLTVKTMRLVTKQSHNAQK     | 283 |
| M. musculus   | GHSDDVMGLVSVNSDDLNSRLRFLQNSLGAVSPFDCYLCRGLKTLQVRMEKHFKNGMA    | 274 |
| H. Sapiens    | GHSDDVMGLVSVNCSLHNRLRFLQNSLGAVSPIDCYLNRGLKTLHVRMEKHFKNGMA     | 275 |
| S. Cerevisiae | GHSDDVVLGVLATNNKPLYERLQFLQNAIGAIPSPFDLWLRGLKTLHLRVRQAALSANK   | 267 |
| C. albicans   | GHSDDVMGLVATNDSQLHERFRFLQNAIGSIPSPFDLWLAHRGLKTLHLRVRQAASNAQR  | 272 |
|               | * : . : * : . : : : * : * * * : * : * : * : *                 |     |
| T. gondii     | IAEFLSKH-HKVEHVIYPGIPSPQKELALKQHK-NVHGGMLAFEVKGTEAGIRMMNHV    | 351 |
| L. major      | IAEFLETH-RAVDRVYVYPLASHPQKELADRQHRNHLHGGMLWFEVKGTEAGRRMMDTV   | 342 |
| T. cruzi      | VAEFLETH-PAVEKVMYPGLKSPQKALADRQHLNHLHGGMLWFEVKGTEAGRRMMDTV    | 342 |
| T. grayi      | VAEFLETH-PAVERVMYPGLKSPQKALADRQHANHLHGGMLWFEVKGTEAGRRMMDTV    | 342 |
| M. musculus   | VARFLETH-PRVEKVMYPGLSPHQLAKRQCSG--CPGMVSYIKGALQHAQKAFI-KN     | 330 |
| H. Sapiens    | VAQFLESN-PWVEKVIYPGLSPHQLAKRQCTG--CTGMVTFYIKGTLQHAQKAFI-KN    | 331 |
| S. Cerevisiae | IAEFLAADKENVAVNYPGLKTHPNYDVLKQHRDALGGGMSIFRIKGGAEASKFA-SS     | 326 |
| C. albicans   | IAEYLSQH-SAVLKVNYPGLKSHRNHDVVLQRQDGLGGGMSIFRIAGGAKGAAVFT-SS   | 330 |
|               | : * : * * * * * : : : * * * * * : * : * : *                   |     |
| T. gondii     | PRPWSLCENLGACESIITCPAVFTHANMLREDRLKVGITDGFIRVSVGIEDVNDLIDGLD  | 411 |
| L. major      | PRPWSLCENLGASESIITCPSVMTHANMTSEDRMKVGITDGFVRSVCGIEDVDDLIAALK  | 402 |
| T. cruzi      | QRPWSLCENLGAEESIITCPSVMTHANMTKEDRLKVGITDGFVRSVCGIEEAKDLITALK  | 402 |
| T. grayi      | QRPWSLCENLGATESIITCPSVMTHANMTEDRMKVGITDGFVRSVCGIEDAADLISALK   | 402 |
| M. musculus   | LKLFTLAESLGGYESLAEIPAIMTHASVPEKDRATLGINDTLIRLSVGLDEQDLEDLD    | 390 |
| H. Sapiens    | LKLFTLAESLGGFESLAEIPAIMTHASVPEKDRATLGINDTLIRLSVGLDEQDLEDLD    | 391 |
| S. Cerevisiae | TRLFTLAESLGGIESLLEVPAMTHGGIPKEAREASGVFDDLVRSVGIETDLEDLKE      | 386 |
| C. albicans   | TCLFTLAESLGGIESLIEVPAIMTHGGIPKEEREANGVDDLVRSVGIETDLEDLKE      | 390 |
|               | : : * * * * * * * : * : * * * * * * * : * : * : *             |     |
| T. gondii     | YALSKA----- 417                                               |     |
| L. major      | VAMDALV----- 409                                              |     |
| T. cruzi      | TALDAL----- 408                                               |     |
| T. grayi      | AALDALGK----- 410                                             |     |
| M. musculus   | RALKAHP----- 398                                              |     |
| H. Sapiens    | QALKAHPSPGSHS 405                                             |     |
| S. Cerevisiae | QALKQATN----- 394                                             |     |
| C. albicans   | QALQKAASV----- 399                                            |     |
|               | * : .                                                         |     |

**Figure S1.** Sequence alignment of CGL from different organisms. Black shading indicates the PLP-binding lysine in the active site. The target residues for mutational analysis are indicated by arrows. The CGLs used in this alignment (NCBI accession number) are XP\_002364505.1, *Toxoplasma gondii* ME49; XP\_003722717.1, *Leishmania major*; EKG03141.1, *Trypanosoma cruzi*; XP\_009313447.1, *Trypanosoma grayi*; NP\_666065.1, *Mus musculus*; NP\_001893.2, *Homo sapiens*; NP\_009390.1, *Saccharomyces cerevisiae*; XP\_716241.1, *Candida albicans*. All sequence alignments were carried out using the Clustal OMEGA program.

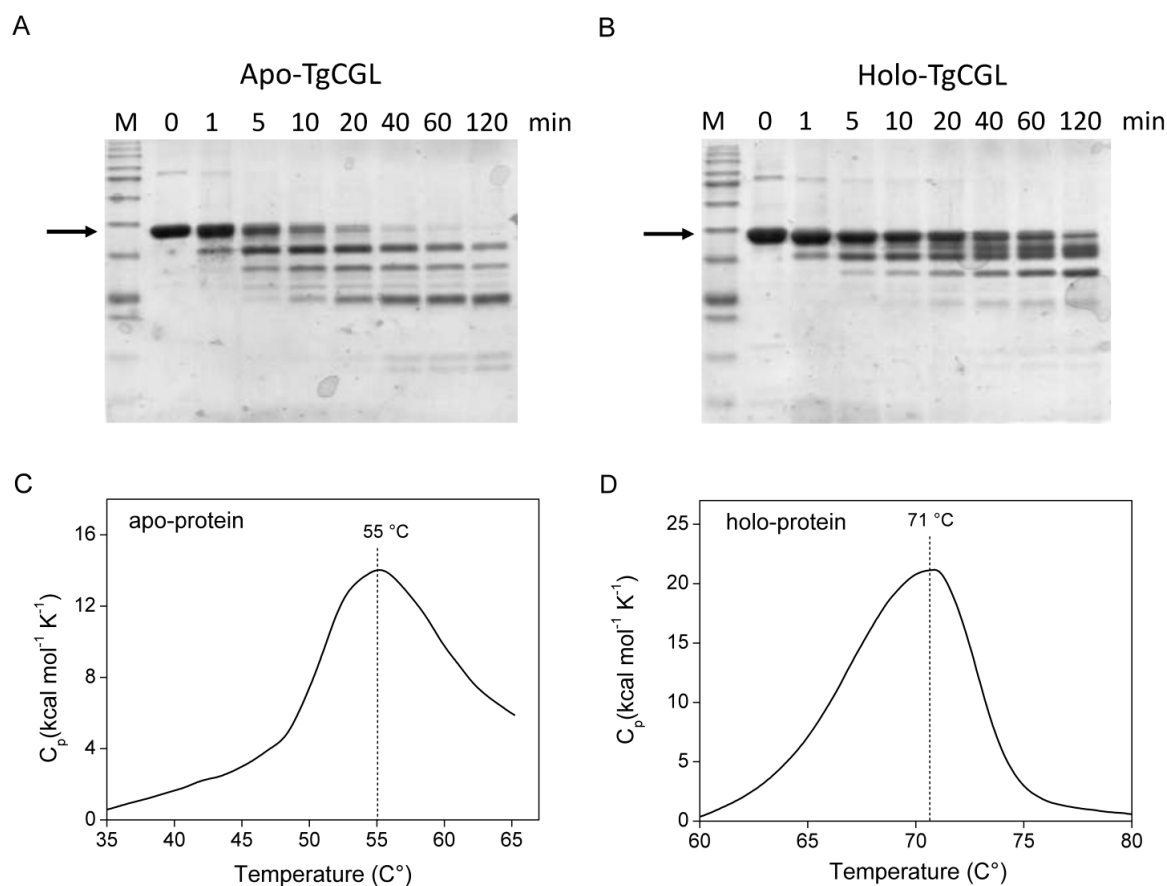

**Figure S2.** Properties of apo-TgCGL. (A) and (B). Trypsin digestion profile of apo- (A) and holo-TgCGL (B) after incubation of TgCGL with trypsin 1:200 (*w/w*) for 0, 1, 5, 10, 20, 40, 60 and 120 min, respectively. The intensity of the untreated with trypsin TgCGL band (lane 0 min) was assumed as 100%. The arrow indicates the untreated 46 kDa band. Lane M represents a molecular mass marker. (C) and (D). Representative DSC thermograms of apo- (C) and holo-TgCGL (D), respectively, after baseline-correction.

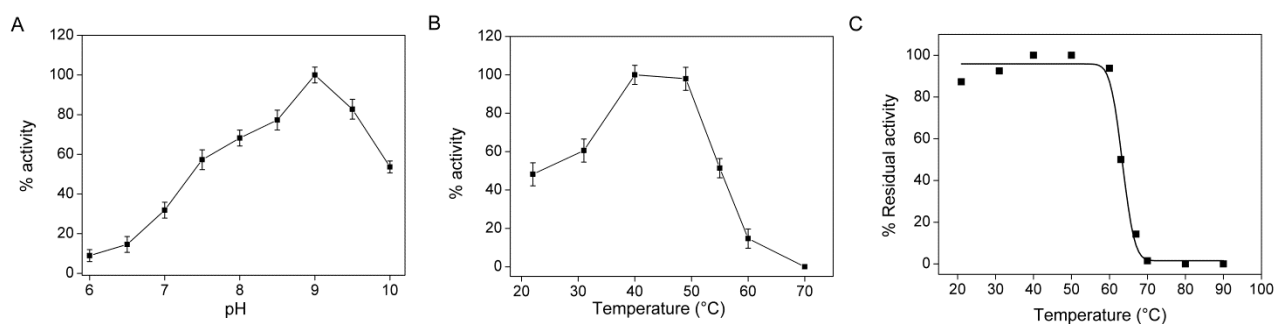

**Figure S3.** pH and temperature optima for L-cystathionine hydrolysis of TgCGL. (A) Effect of pH on purified TgCGL in MBP buffer in the pH range of 6–10 at 37 °C. (B) Effect of temperature on the activity of purified TgCGL at pH 9. (C) Representative thermal stability curve for purified TgCGL,

held at temperature range from 20 to 90 °C for 15 min. L-cystathionine hydrolysis was estimated using the DTNB assay.

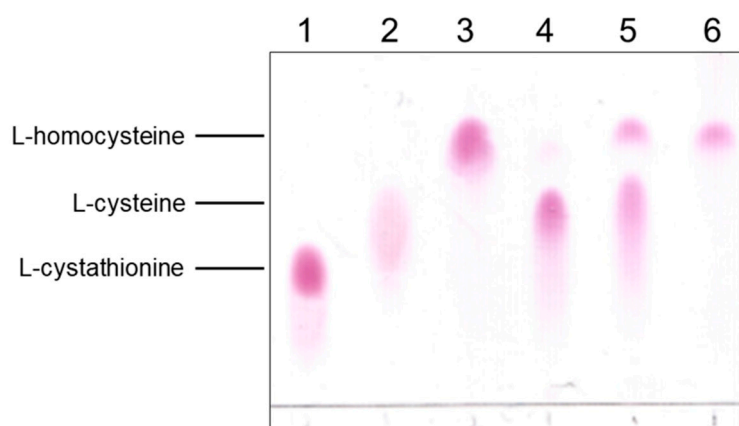

**Figure S4.** TLC analysis of the amino acid products of L-cystathionine hydrolysis by wt and N360S TgCGL variants. Reaction products and amino acid standards were separated by TLC and derivatized with ninhydrin. Spotting volume is 1  $\mu$ L. Lane 1–3, amino acids standards. Lane 1: 1 mg/mL L-cystathionine; lane 2: 1 mg/mL L-cysteine; lane 3: 1 mg/mL L-homocysteine; lane 4: 5 mM L-cystathionine + 100  $\mu$ M wt TgCGL; lane 5: 5 mM L-cystathionine + 100  $\mu$ M N360S TgCGL; lane 6: 5 mM L-cystathionine + 10  $\mu$ M cystathionine  $\beta$ -lyase from *Corynebacterium diphtheriae* which catalyzes the  $\beta$ -elimination of L-cystathionine to generate ammonia, pyruvate, and homocysteine [34].

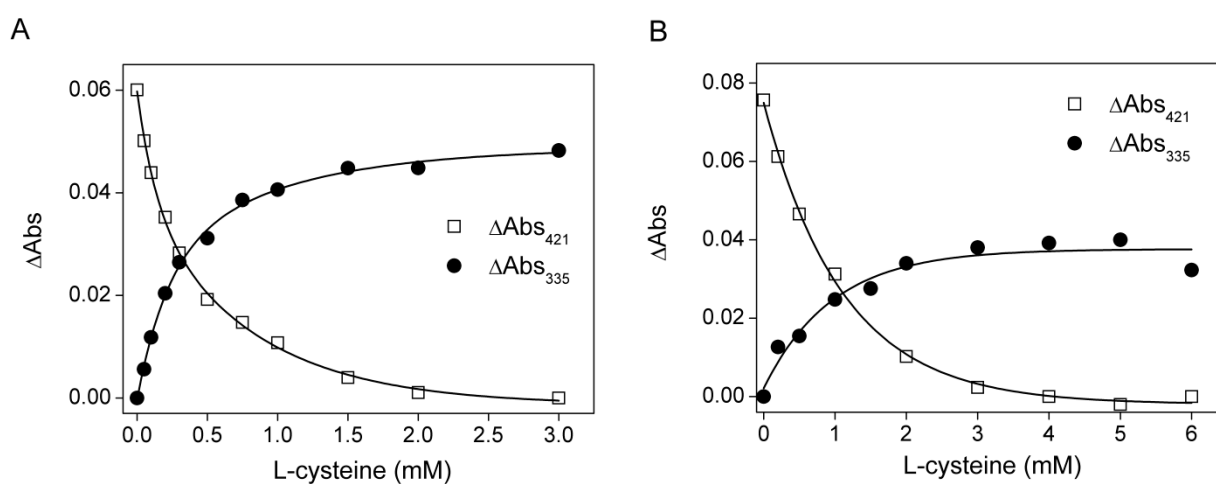

**Figure S5.** Spectral characterization of the interaction between TgCGL N360S and S77E variants and L-cysteine. Absorbance changes of N360S (A) and S77E (B) variants at 335 (solid circle) and 421 nm (open square) plotted against L-cysteine concentration. The continuous lines represent the theoretical curves according to Eqn. (3): 335 nm ( $K_{app}$  N360S =  $335 \pm 15$   $\mu$ M;  $K_{app}$  S77E =  $677 \pm 180$   $\mu$ M), and 421 nm ( $K_{app}$  N360S =  $331 \pm 20$   $\mu$ M;  $K_{app}$  S77E =  $874 \pm 87$   $\mu$ M).

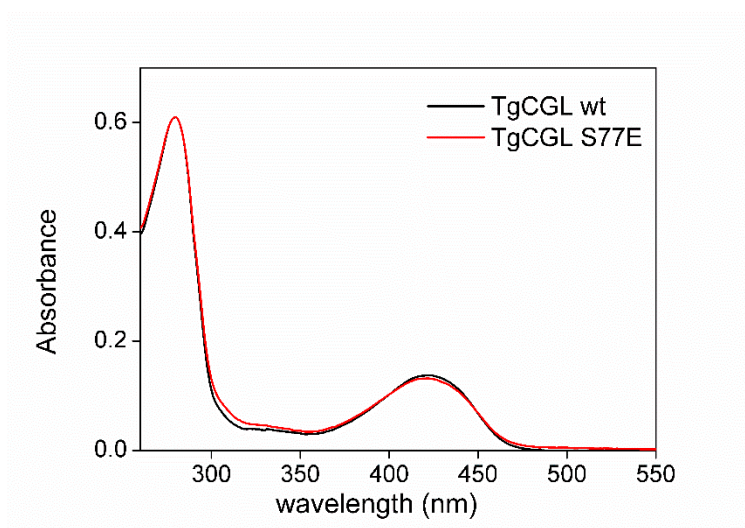

**Figure S6.** UV–visible absorption spectra of TgCGL wt (black line) and S77E variant (red line).

**Table S1.** List of mutagenic primers used to generate TgCGL active site variants. PF = Primer Forward, PR = Primer Reverse.

| Mutation | Type of Primer | Primer Sequence                          |
|----------|----------------|------------------------------------------|
| S77E     | PF             | GAGCAAAGGGTTCGAATATTCGCGAACTAGTAACCCG    |
|          | PR             | CGGGTTACTAGTTCGCGAATATTCGAACCCTTGCTC     |
| S77A     | PF             | CTATTTGAGCAAAGGGTTCGCATATTCGCGAACTAGTAAC |
|          | PR             | GTTACTAGTTCGCGAATATGCGAACCCTTGCTCAAATAG  |
| N360S    | PF             | GGTCTTTGTGTGAAAGCCTGGGAGCGTGCG           |
|          | PR             | CGCACGCTCCCAGGCTTTCACACAAAGACC           |
